# Supplementary material for: Combining Molecular Weight Fractionation and Metabolomics to Elucidate the Bioactivity of Vegetal Protein Hydrolysates in Tomato Plants
Source: Front Plant Sci. 2020 Jun 30;11:976. doi: 10.3389/fpls.2020.00976 (PMC7338714; doi:10.3389/fpls.2020.00976)
Supplement: Supplementary Table 2 — VIP discriminant compounds as identified from OPLS-DA discriminant analysis of tomato cutting metabolomic profiles following either a protein hydrolysate (PH), PH1 or indole-3-butyric acid application (Exp. 2). [file Table_2.xlsx]

## Sheet: VIP markers
Var ID (Primary)	M1.VIP[3+2+0]	2.44693 * M1.VIP[3]cvSE
(<i>E</i>)-<i>N</i>-hydroxy-6-(methylsulfanyl)heximidothioate	1.52149	0.431352
1-linoleoyl-2-linoleoyl-phosphatidylcholine	1.50999	0.416634
strictosidine-aglycone	1.49644	0.436661
tris	1.49022	0.670821
<i>trans</i>-5-O-(4-coumaroyl)shikimate	1.48935	0.320873
gibberellin A<sub>24</sub>	1.47094	0.688622
(+)-sesamolinol	1.46554	0.594387
papaverine	1.46483	0.534681
(R)-canadine	1.46483	0.534681
S-canadine	1.46483	0.534681
curcumin monoglucoside	1.46357	0.399039
&gamma;-L-glutamyl-(<i>S</i>)-2-carboxypropyl-L-cysteinyl-glycine	1.45961	0.431399
1-naphthol 6'-O-malonylglucoside	1.45957	0.431516
2-naphthol 6'-O-malonylglucoside	1.45957	0.431516
(Z)-butanethial S-oxide	1.45581	0.275507
(<i>E</i>)-1-butenesulfenate	1.45581	0.275507
&delta;-tocotrienol	1.45307	0.20872
Fe(II)-nicotianamine	1.44978	0.534652
TRIBOA-&beta;-D-glucoside	1.44679	0.568038
5-formamido-1-(5-phospho-D-ribosyl)-imidazole-4-carboxamide	1.44595	0.587572
O-sinapoylglucarolactone	1.44583	0.555999
4&alpha;-carboxy-4&beta;-methyl-5&alpha;-cholesta-8,24-dien-3&beta;-ol	1.44136	0.229857
4&alpha;-carboxy-ergosta-7,24(24<sup>1</sup>)-dien-3&beta;-ol	1.44136	0.229857
2-oxo-3-carboxy-4,5-cyclopropylhex-5-enoate	1.4388	0.272432
crocetin	1.43727	0.682991
justicidin B	1.43649	0.687028
8-(methylthio)octyl-glucosinolate	1.4351	0.327564
fosmidomycin	1.43493	0.304409
rosmarinate	1.43367	0.536419
FMNH<SUB>2</SUB>	1.43154	0.29152
apigenin 7-O-[&beta;-D-apiosyl-(1&rarr;2)-&beta;-D-glucoside]	1.43117	0.69251
isovitexin 2''-<i>O</i>-arabinoside	1.43008	0.69495
pelargonidin 3-<i>O</i>-&beta;-<i>D</i>-sambubioside	1.43008	0.69495
afrormosin-7-O-glucoside-6''-O-malonate	1.42551	0.705736
5'-(p-nitrophenyl)thioadenosine	1.42391	0.682119
diacetyl	1.42303	0.467192
1-hydroxy-3-indolylmethyl glucosinolate	1.41802	0.338915
1-hydroxyglucobrassicin	1.41802	0.338915
4-hydroxyglucobrassicin	1.41802	0.338915
dioxindole-3-acetyl-3-O-beta-glucose	1.41715	0.316175
7-hydroxy-2-oxindole-3-acetate glucoside	1.41715	0.316175
3-deoxy-D-<i>manno</i>-octulosonate 8-phosphate	1.41644	1.00261
6-hydroxy-allocryptopine	1.41569	0.525451
3-hydroxy secoberbine intermediate	1.41569	0.525451
(<i>S</i>)-scoulerine	1.41563	0.608071
(S)-coreximine	1.41563	0.608071
1-palmitoyl-2-&alpha;-linolenoyl-phosphatidylcholine	1.41519	0.33207
gibberellin A<sub>8</sub>	1.41402	0.313042
(<i>Z</i>)-indol-3-ylacetaldoxime	1.41324	0.338257
dalpatein 7-O-&beta;-D-apiofuranosyl-(1->6)-&beta;-D-glucopyranoside	1.412	0.579152
feruloylserotonin	1.41176	0.39942
<i>N</i>-acetyl-<i>S</i>-geranylgeranyl-L-cysteine	1.41012	0.965596
mono-<i>trans</i>, poly-<i>cis</i>-decaprenyl group	1.40928	0.50319
(<i>E</i>)-1-(glutathion-<i>S</i>-yl)-<i>N</i>-hydroxy-&omega;-(methylsulfanyl)butan-1-imine	1.40775	0.738419
acidomycin	1.40737	0.374262
4-methylumbelliferone 6'-O-malonylglucoside	1.40737	0.315627
3-aminobutanoate	1.40349	0.408524
4-aminobutanoate	1.40349	0.408524
N-methyl-&beta;-alanine	1.40349	0.408524
(S)-2-aminobutanoate	1.40349	0.408524
(S)-3-amino-2-methylpropanoate	1.40349	0.408524
(R)-3-amino-2-methylpropanoate	1.40349	0.408524
26-hydroxybrassinolide	1.40246	0.381551
gibberellin A<sub>19</sub>	1.40177	0.653376
(+)-lariciresinol	1.40177	0.653376
(-)-lariciresinol	1.40177	0.653376
(3R,4R)-3,4-bis(4-hydroxy-3-methoxybenzyl)tetrahydro-2-furanol	1.40177	0.653376
gibberellin A<sub>36</sub>	1.40177	0.653376
